# Supplementary material for: Large reversible strains in the vicinity of the ferroelectric/antiferroelectric morphotropic phase boundary of a (0.97–x)Bi0.5Na0.5TiO3–0.03BaTiO3–xNaNbO3 ternary system
Source: Royal Society of Chemistry journal article supplement (doi:10.1039/d2tc02535c), 2022-01-01
Supplement: d2tc02535c1.pdf [file d2tc02535c1.pdf]

**Fig. S1.** XRD patterns of (a) unpoled and (b) poled ceramics. (c-d) the Rietveld refinement results of XRD patterns for  $x=0$  ceramic before and after poling.

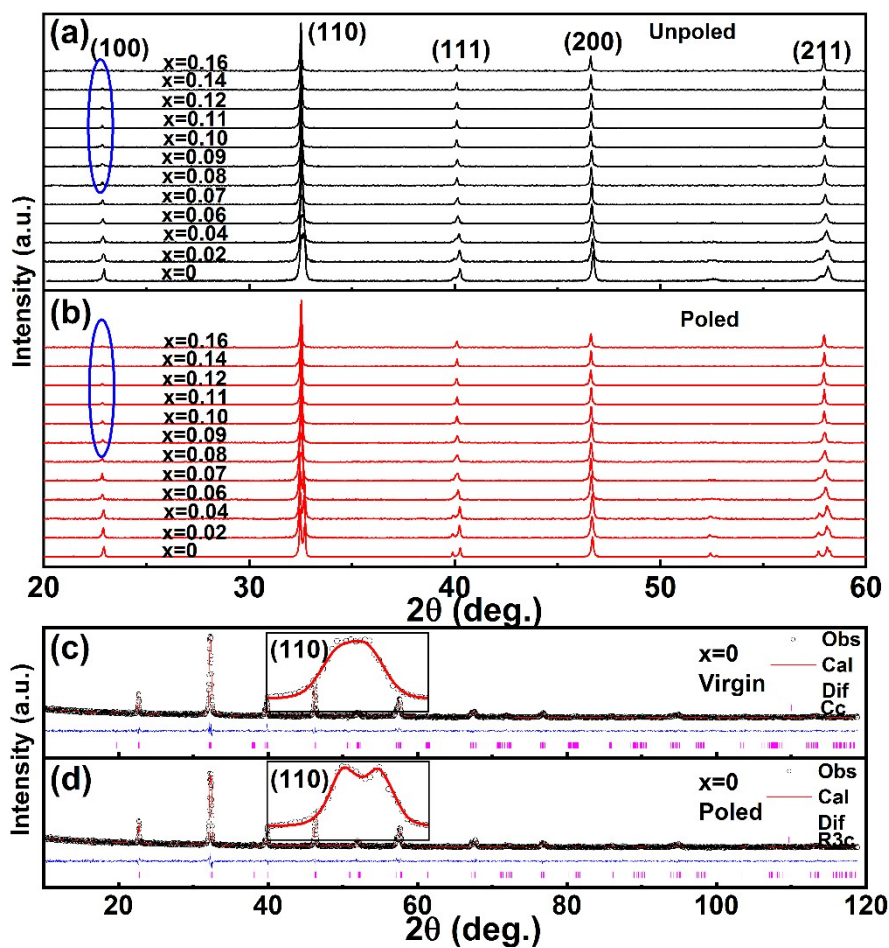

**Fig. S2.** Dielectric permittivity and loss tangent as a function of temperature and frequency for unpoled and poled (0.97-x)BNT-0.03BT-xNN ceramics: (a-l)  $x=0-0.16$ .

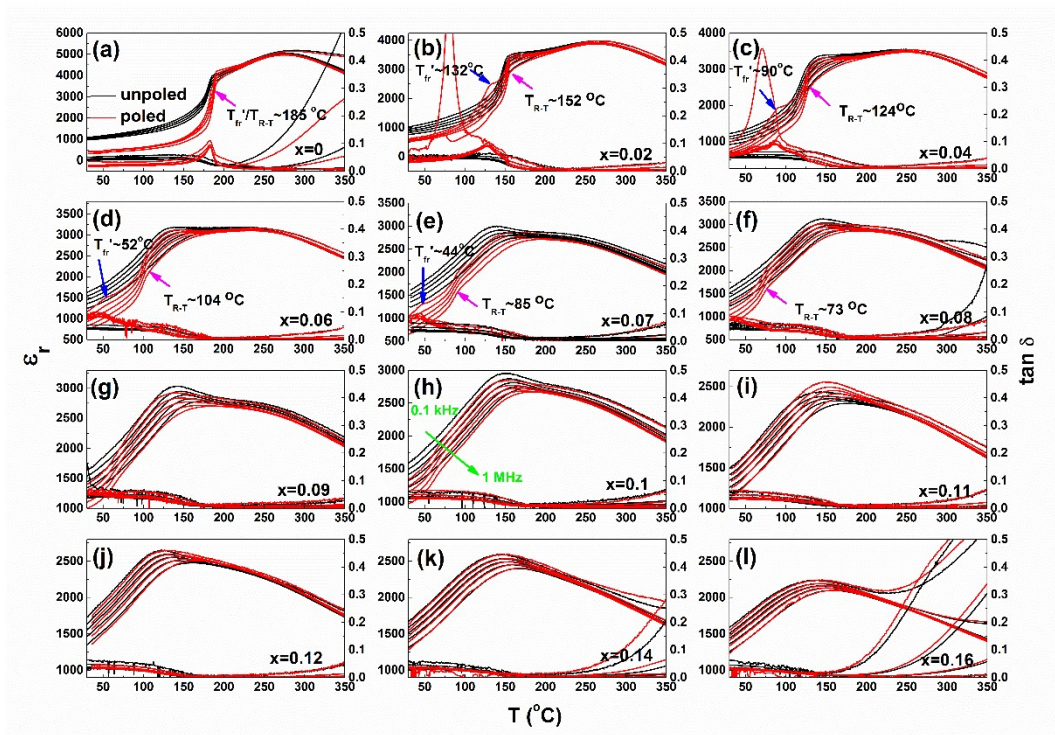

**Fig. S3.** P-E, S-E and the corresponding J-E curves at 2 Hz during the first and second electric cycles for  $(0.97-x)\text{BNT}-0.03\text{BT}-x\text{NN}$  ceramics: (a-l)  $x=0-0.16$ .

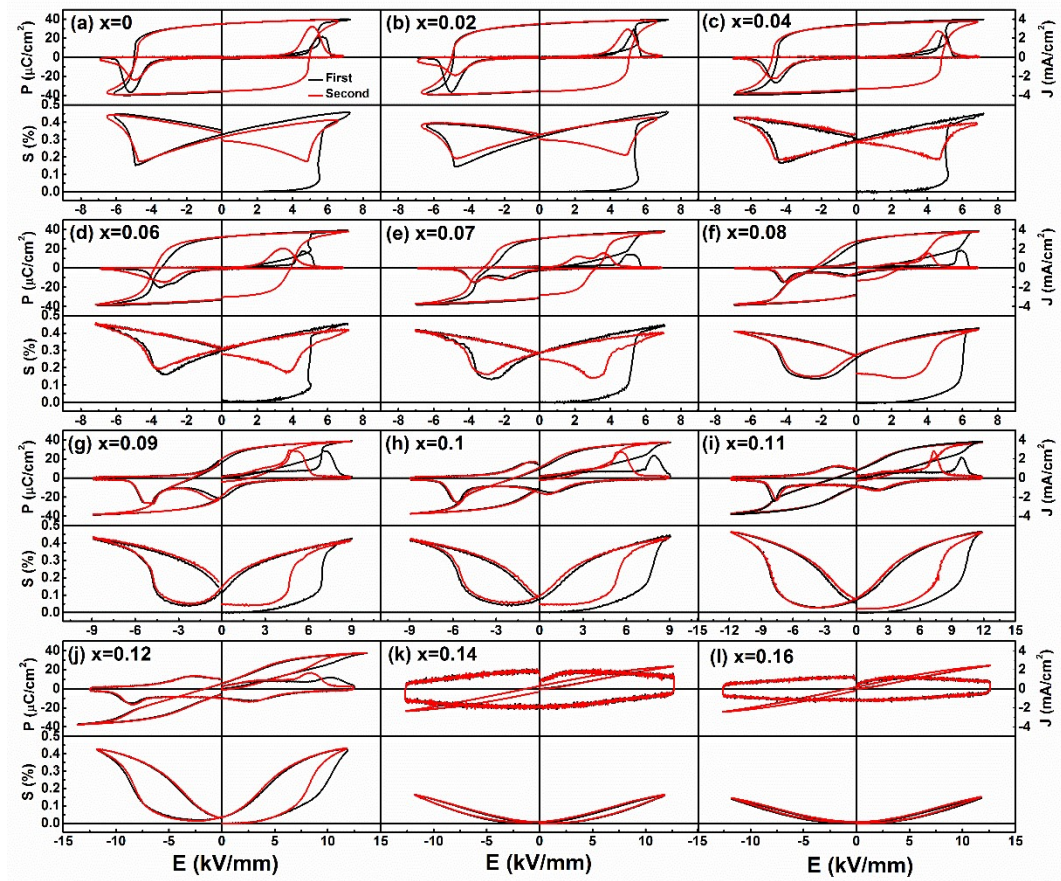

| Composition | Space group | Lattice parameters                                                                                                                       | V ( $\text{\AA}^3$ ) | R <sub>wp</sub> (%) | R <sub>p</sub> (%) | $\chi^2$ |
|-------------|-------------|------------------------------------------------------------------------------------------------------------------------------------------|----------------------|---------------------|--------------------|----------|
| x=0 Virgin  | Cc          | a=9.6002(4) $\text{\AA}$ ,<br>b=5.5428(3) $\text{\AA}$ ,<br>c=5.5750(1) $\text{\AA}$ ,<br>$\alpha=\gamma=90^\circ$ $\beta=125.094^\circ$ | 242.73               | 10.09               | 7.88               | 1.46     |
| x=0 Poled   | R3c         | a=b=5.5399(4) $\text{\AA}$ ,<br>c=13.6931(11) $\text{\AA}$ ,<br>$\alpha=\beta=90^\circ$ $\gamma=120^\circ$                               | 363.946              | 9.92                | 7.77               | 1.39     |

**Table S1.** Refined structural parameters by using Rietveld method for the x=0 ceramic before and after poling.
